# Supplementary material for: IL-20 Activates ERK1/2 and Suppresses Splicing of X-Box Protein-1 in Intestinal Epithelial Cells but Does Not Improve Pathology in Acute or Chronic Models of Colitis
Source: MDPI journal article supplement (doi:10.3390/ijms24010174), 2022-12-22
Supplement: s1 [file s1]

## Supplementary Figure S1

### A Differentiated WT mIECs

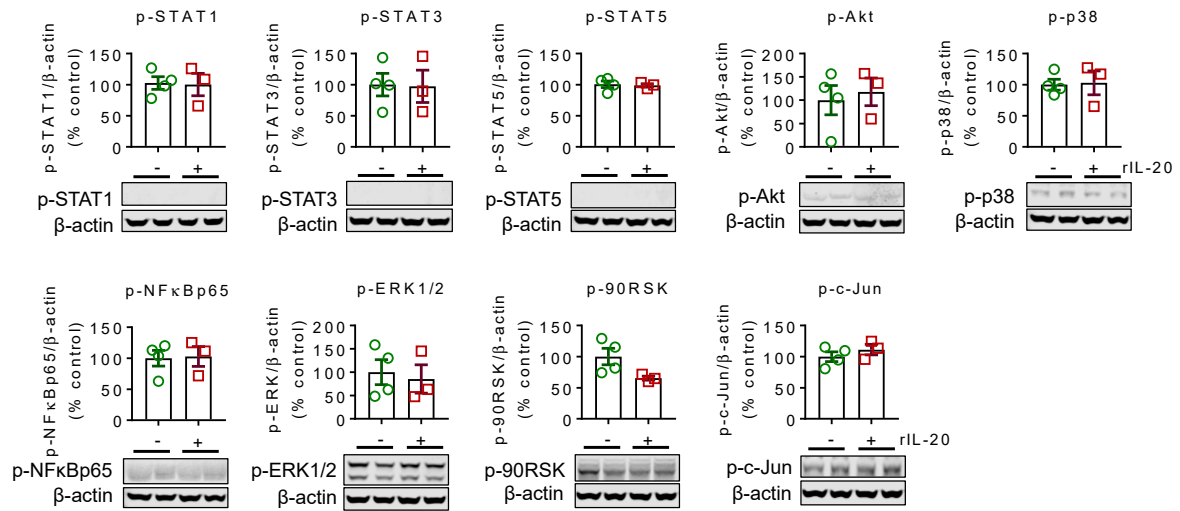

### B Differentiated Winnie mIECs

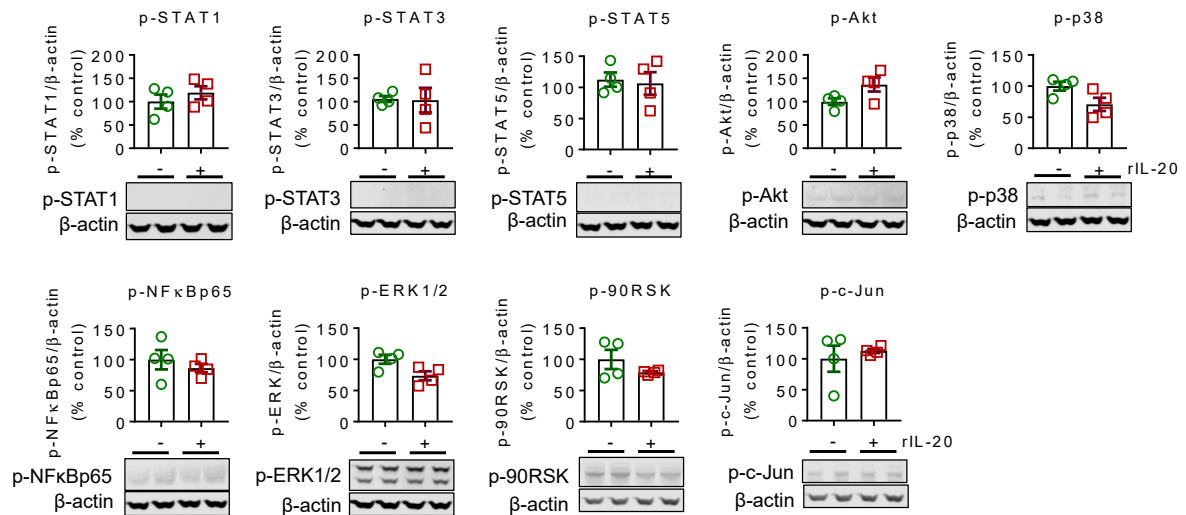

Figure S1: rIL-20 specific modulation of signalling pathways in differentiated primary intestinal epithelial cells. DAPT treated primary colonic organoids from C57BL/6 (A) and Winnie (B) were analysed for phosphorylated STAT1, STAT3, STAT5, Akt, p38, NF-κβ p65, ERK1/2, 90-RSK, and p-c-Jun by Western blot assay after treatment with rIL-20 (100 ng/mL) for 1 h. Data are presented as mean ± SEM with individual cultures from 3-4 independent experiments (non-parametric Man-Whitney t-test).

## Supplementary Figure S2

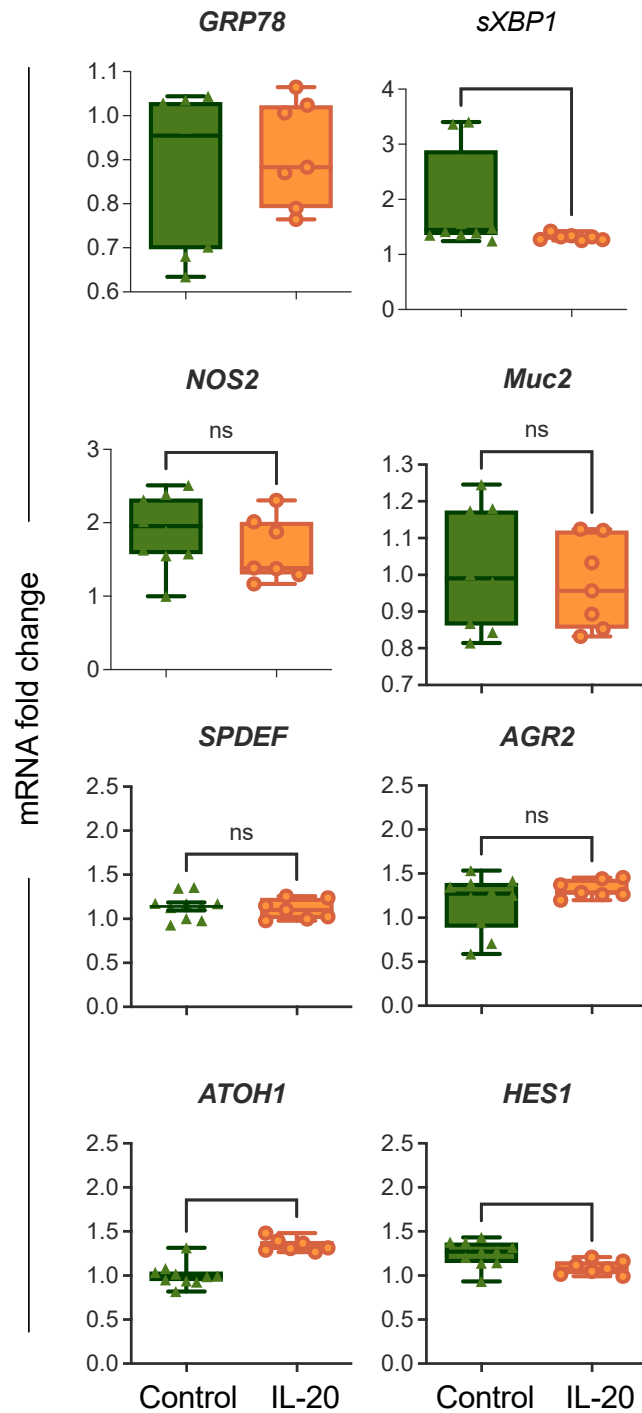

Figure S2: Intestinal cellular stress and differentiation markers in the rIL-20 treated LS174T cells. Relative mRNA expression levels of ER stress, goblet cell and intestinal stem cell inducing transcriptional factors measured by qRT-PCR in the LS174T cells treated with vehicle (PBS) or IL-20 (100 ng/mL) for 24 h. Data are presented as mean ± SEM (n=7-9), compared with PBS controls, student's t-test.

## Supplementary Figure S3

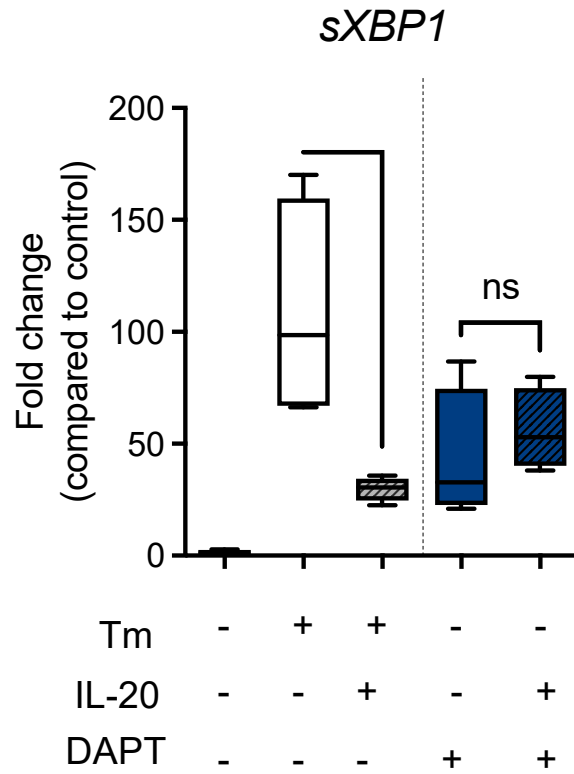

Figure S3: rIL-20 modulates cellular ER stress in LS174T cell lines. Undifferentiated and differentiated LS174T cell lines were co-treated with 10  $\mu$ M tunicamycin (6 h) and rIL-20 (100 ng/mL) for 24 h and analysed for cellular stress marker, *sXBP1* by qRT-PCR. Data are presented as mean  $\pm$  SEM (n=12), \*P<0.01, one-way ANOVA followed by Dunnett's post hoc test.

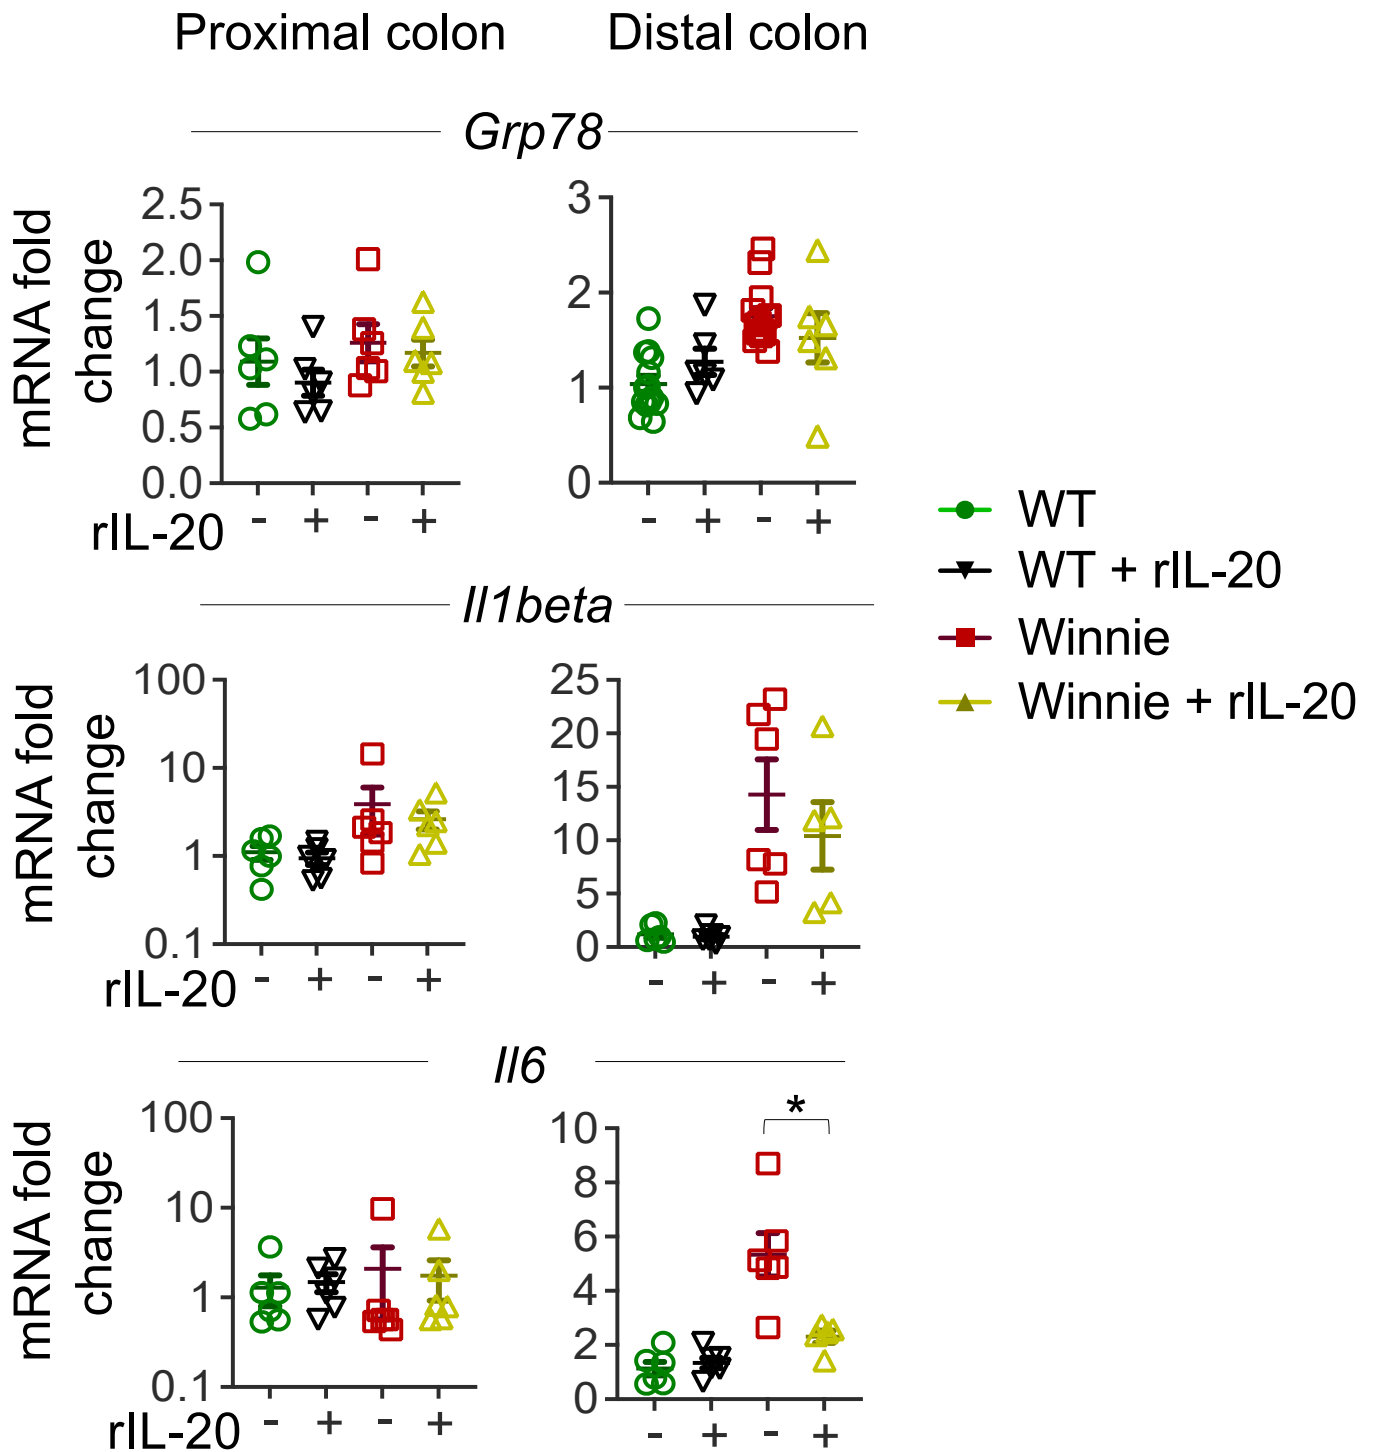

Figure S4: ER stress and pro-inflammatory markers in rIL-20 treated Winnie mice. Relative mRNA levels of *GRP78*, *Il1β* and *Il6* measured by qRT-PCR in the proximal and distal colon tissues harvested from naïve and rIL-20 treated C57BL/6 and Winnie mice (as described in Figure 3). Data are presented as mean ± SEM (n=6-8).

\* P<0.05, one-way ANOVA followed by Dunnett's post hoc test.

**Table S1: Primer Sequences**

| <b>Primers</b>                  | <b>Sequence</b>                                                            |
|---------------------------------|----------------------------------------------------------------------------|
| <i>mTata box</i>                | Forward: CTCAGTTACAGGTGGCAGCA<br>Reverse: ACCAACAATCACCAACAGCA             |
| <i>mGrp78</i>                   | Forward: TGCTGCTAGGCCTGCTCCGA<br>Reverse: CGACCACCGTGCCACATCC              |
| <i>m/hXbp1</i>                  | Forward: GAGTCCGCAGCAGGTGC<br>Reverse: CAAAAGGATATCAGACTCAGAATCTGAA        |
| <i>mNos2</i>                    | Forward: CAGCTGGGCTGTACAAACCTT<br>Reverse: CATTGGAAGTGAAGCGTTTCG           |
| <i>mMuc2</i>                    | Forward: CCATTGAGTTTGGGAACATGC<br>Reverse: TTCGGCTCGGTGTTTCAGAG            |
| <i>mAgr2</i>                    | Forward: CGGTGAGGGCAGACATCACTGGA<br>Reverse: CCGGTGCGCAGTTGGCTCTA          |
| <i>mHes1</i>                    | Forward: GGTCTAACGCAGTGTACC<br>Reverse: GAGAGGTGGGCTAGGGACTT               |
| <i>mSpdef</i>                   | Forward: GGTGCCTGCTACTGTTCCCAGATG<br>Reverse: AAAGCCACTTCTGCACGTTACCAG     |
| <i>mAtoh-1</i>                  | Forward: GCTTCCTCTGGGGGTACTC<br>Reverse: GAAGGCGACAGGTCCTTCTG              |
| <i>mIL-1<math>\beta</math></i>  | Forward: CAACCAACAAGTGATATTCTCCATG<br>Reverse: GATCCACACTCTCCAGCTGCA       |
| <i>mTnf-<math>\alpha</math></i> | Forward: CATCTTCTCAAATTCGAGTGACAA<br>Reverse: TGGGAGTAGACAAGGTACAACCC      |
| <i>mIL-6</i>                    | Forward: TCAGGAAATTTGCCTATTGAAA<br>Reverse: GGAAATTGGGGTAGGAAGGA           |
| <i>mMip2<math>\alpha</math></i> | Forward: ACGTGTTCCAGGACACAACA<br>Reverse: ACAAACCCTCCCCACCTAAC             |
| <i>mIL-10</i>                   | Forward: AGCTCCAAGACCAAGGTGTC<br>Reverse: TCCAAGGAGTTGTTTCCGTTA            |
| <i>mIL-17a</i>                  | Forward: CTCCAGAAGGCCCTCAGACTAC<br>Reverse: AGCTTTCCCTCCGCATTGACACAG       |
| <i>mIL-23p19</i>                | Forward: AGCGGGACATATGAATCTACTAAGAGA<br>Reverse: GTCCTAGTAGGGAGGTGTGAAGTTG |
| <i>Reg3<math>\beta</math></i>   | Forward: ACTCCCTGAAGAATATACCCTCC<br>Reverse: CGCTATTGAGCACAGATACGAG        |
| <i>Reg3<math>\gamma</math></i>  | Forward: GGCCATATCTGCATCATACCAG<br>Reverse: ATGCTTCCCCGTATAACCATCA         |
| <i>mLrg1</i>                    | Forward: TTGGCAGCATCAAGGAAGC<br>Reverse: CAGATGGACAGTGTGCGCA               |
| <i>mTimpl</i>                   | Forward: TACACCCAGTCATGGAAAGC<br>Reverse: CGGCCCGTGATGAGAACT               |
| <i>mTrim15</i>                  | Forward: TGAGCGAGACCTACTGTGAAG                                             |

|                  |                                      |
|------------------|--------------------------------------|
|                  | Reverse: AACCGACTCCTGAGACGATCC       |
| <i>mOsmr</i>     | Forward: TCAAGCCACGAAGGGTCCTAA       |
|                  | Reverse: GTCTTAAAGTCTCGGGTTTCACA     |
| <i>mLcn2</i>     | Forward: TGGCCCTGAGTGTCATGTG         |
|                  | Reverse: CTCTTGTAAGTCATAGATGGTGC     |
| <i>mIL-18</i>    | Forward: ACGTGTTCCAGGACACAACA        |
|                  | Reverse: ACAAACCCTCCCCACCTAAC        |
| <i>mIL-33</i>    | Forward: CGGATCCACTTCACTTTTAACACAGTC |
|                  | Reverse: GAGATCTTTAGATTTTTCGAGAGCTTA |
| <i>mIL-13ral</i> | Forward: AGCGTCTCTGTGCGAAAATCTCT     |
|                  | Reverse: GAGTGCAATTTGGACTGGCTC       |
| <i>mSmad4</i>    | Forward: ACACCAACAAGTAACGATGCC       |
|                  | Reverse: GCAAAGGTTTCACTTTCCCCA       |
| <i>mSocs3</i>    | Forward: GGACCAAGAACCTACGCATCCA      |
|                  | Reverse: CACCAGCTTGAGTACACAGTCG      |
| <i>mClaudin4</i> | Forward: GGCGTCTATGGGACTACAGG        |
|                  | Reverse: GAGCGCACAACTCAGGATG         |
| <i>mClaudin8</i> | Forward: GTGGATGTGGCCCTAAAGC         |
|                  | Reverse: CGCTGTGGTCCAGCCTAT          |
| <i>mZo-1</i>     | Forward: TTTTGTGACAGGGGGAGTGG        |
|                  | Reverse: TGCTGCAGAGGTCAAAGTTCAAG     |
